# Supplementary material
Source: PubMed Central journal article supplement (PMC4609196)
Supplement: joa0227-0596-sd1.pdf [file joa0227-0596-sd1.pdf]

| Group   | Day         | Animal      | Week 1 | Week 2 | Week 3 | Week 4 | Week 5 | Week 6 | Week 7                         |
|---------|-------------|-------------|--------|--------|--------|--------|--------|--------|--------------------------------|
| Biopsy  |             | 45 OT-45-15 | 8.1    | 9.2    | 9.8    | 10.8   | 12.3   | 13.6   | 14.3 alternate biopsy location |
|         |             | 45 RT-45-8  | 9.5    | 11     | 12.2   | 13.1   | 13.9   | 15.2   | 15.9 alternate biopsy location |
|         |             | 45 RB-45-3  | 9.2    | 10.6   | 12     | 13.2   | 15     | 16.4   | 17.4                           |
|         |             | 45 RB-45-4  | 10.4   | 11.9   | 12.7   | 14.6   | 16.1   | 19.7   | alternate biopsy location      |
|         |             | 45 OB-45-11 | 13.1   | 14.9   | 15.3   | 17.1   | 18     | 19     | 18.3 alternate biopsy location |
|         |             | 45 RT-45-7  | 13.6   | 16.1   | 17.5   | 19.2   | 20.8   | 22.2   | 19.9                           |
|         |             | 45 OB-45-12 | 17     | 20     | 21.4   | 22.5   | 25.1   | 28.4   | 23.3 alternate biopsy location |
|         |             | 28 14JA-13  | 8.3    | 10.3   | 11.3   | 11.6   |        |        | 28.4                           |
|         |             | 28 14JA-14  | 8.6    | 10.3   | 11.3   | 12.8   |        |        |                                |
|         |             | 28 14JA-18  | 9.1    | 10.9   | 12     | 13.5   |        |        |                                |
|         |             | 28 14JA-06  | 9.9    | 11.9   | 13.5   | 14.5   |        |        |                                |
|         |             | 14 14JA-09  | 8.2    | 9.9    |        |        |        |        |                                |
|         |             | 14 14JA-16  | 8.5    | 9.9    |        |        |        |        |                                |
|         |             | 14 14JA-10  | 9.1    | 11.4   |        |        |        |        |                                |
|         |             | 14 14JA-25  | 10.3   | 12     |        |        |        |        |                                |
|         |             | 8 RT-8-5    | 10.6   | 12     |        |        |        |        | alternate biopsy location      |
|         |             | 8 RB-8-2    | 13.9   | 15.1   |        |        |        |        | alternate biopsy location      |
|         |             | 8 RB-8-1    | 13.9   | 15.7   |        |        |        |        | alternate biopsy location      |
|         |             | 8 RT-8-6    | 13.6   | 16     |        |        |        |        | alternate biopsy location      |
|         |             | 8 OB-8-10   | 15.7   | 17.6   |        |        |        |        | alternate biopsy location      |
|         |             | 8 OT-8-14   | 16.4   | 18.4   |        |        |        |        | alternate biopsy location      |
|         |             | 8 OT-8-13   | 16.4   | 18.5   |        |        |        |        | alternate biopsy location      |
|         |             | 8 OB-8-9    | 17.6   | 19.6   |        |        |        |        |                                |
|         |             | 5 14JA-19   | 7.8    |        |        |        |        |        |                                |
|         |             | 5 14JA-23   | 8.2    |        |        |        |        |        |                                |
|         |             | 5 14JA-03   | 8.3    |        |        |        |        |        |                                |
|         |             | 5 14JA-15   | 8.7    |        |        |        |        |        |                                |
|         |             | 2 14JA-20   | 8.3    |        |        |        |        |        |                                |
|         |             | 2 14JA-21   | 9.1    |        |        |        |        |        |                                |
|         |             | 2 14JA-12   | 10.1   |        |        |        |        |        |                                |
|         |             | 2 14JA-22   | 10.1   |        |        |        |        |        |                                |
|         |             | 0.5 14JA-11 | 9.2    |        |        |        |        |        |                                |
|         | 0.5 14JA-05 | 9.3         |        |        |        |        |        |        |                                |
|         | 0.5 14JA-24 | 9.5         |        |        |        |        |        |        |                                |
|         | 0.5 14JA-07 | 10.1        |        |        |        |        |        |        |                                |
| Control |             | Control-1   | 22.9   | 23.8   | 25.9   | 26.6   | 27.7   | 29.3   | 29.7                           |
|         |             | Control-2   | 14.7   | 15.9   | 17.9   | 19.7   | 20.9   | 22.3   | 24.6                           |
|         |             | 14JA-08     | 6.6    | 7.7    | 8.1    | 8.8    | 9.7    | 10.5   |                                |
|         |             | 14JA-17     | 6.95   | 8.2    | 10.1   | 10.8   | 11.6   | 12.4   |                                |
|         |             | 14JA-04     | 8      | 10.2   | 11.2   | 13.1   | 14.5   | 15.8   |                                |
|         |             | 14JA-01     | 8.8    | 10.3   | 11.9   | 13.2   | 14.7   | 16.2   |                                |
|         |             | 14JA-02     | 10.9   | 13     | 14.7   | 15.9   | 16.6   | 17.3   |                                |

Day = day of tissue collection  
Animal = animal name  
Week = weekly body weight (g)  
Alternate biopsy location indicates that one or both of the biopsies were placed more at the proximal (base) of the tail or on a regenerated tail.
